# Supplementary material
Source: PubMed Central journal article supplement (PMC10308296)

## Supplemental Online Content

Moss A, Daghem M, Tzolos E, et al. Coronary atherosclerotic plaque activity and future coronary events. *JAMA Cardiol*. Published online June 28, 2023.  
doi:10.1001/jamacardio.2023.1729

**eTable 1.** Participant Recruitment per Site

**eTable 2.** Scanner Type by Center

**eTable 3.** Clinical Outcomes in Quartiles of Increased Coronary Microcalcification Activity Compared With No Coronary Microcalcification Activity

**eTable 4.** Site Investigator Reported Adverse Events

**eFigure 1.** Measurement of Coronary Microcalcification Activity With <sup>18</sup>F-Sodium Fluoride Uptake

**eFigure 2.** CONSORT Diagram

This supplemental material has been provided by the authors to give readers additional information about their work.

**eTable 1.** Participant Recruitment per Site

| <b>Site</b>        | <b>Patients approached</b> | <b>First patient approached</b> | <b>Patients consented and screened</b> | <b>PET-CT scan completed</b> |
|--------------------|----------------------------|---------------------------------|----------------------------------------|------------------------------|
| <b>Edinburgh</b>   | 454                        | 28 Sep 2015                     | 271 (60%)                              | 205                          |
| <b>Aberdeen</b>    | 901                        | 02 Dec 2015                     | 178 (20%)                              | 134                          |
| <b>Manchester</b>  | 490                        | 25 Jan 2016                     | 202 (41%)                              | 138                          |
| <b>Oxford</b>      | 476                        | 15 Feb 2016                     | 164 (34%)                              | 115                          |
| <b>Leeds</b>       | 225                        | 18 Sep 2017                     | 105 (47%)                              | 70                           |
| <b>Birmingham</b>  | 55                         | 08 Nov 2017                     | 42 (76%)                               | 24                           |
| <b>Cambridge</b>   | 26                         | 07 Mar 2018                     | 20 (77%)                               | 10                           |
| <b>Los Angeles</b> | 14                         | 20 June 2019                    | 7 (50%)                                | 5                            |
| <b>Adelaide</b>    | 43                         | 24 Jul 2019                     | 6 (14%)                                | 5                            |
| <b>Total</b>       | <b>2684</b>                |                                 | <b>995 (37%)</b>                       | <b>706</b>                   |

**eTable 2.** Scanner Type by Center

| <b>Site</b> | <b>PET Scanner</b>                                                                                            | <b>CT Scanner</b>                                                                                                                                                                                                  |
|-------------|---------------------------------------------------------------------------------------------------------------|--------------------------------------------------------------------------------------------------------------------------------------------------------------------------------------------------------------------|
| Edinburgh   | 128-slice Biograph mCT, Siemens Medical Systems                                                               | 128-slice Biograph mCT, Siemens Medical Systems                                                                                                                                                                    |
| Aberdeen    | GE Discovery 710 PET/CT                                                                                       | GE Discovery 710 PET/CT CT component of this is the GE Lightspeed system                                                                                                                                           |
| Manchester  | Until Oct 2018 - Siemens Biograph mCT (64-slice CT)<br>After Oct 2018 - Siemens Biograph Vision (64-slice CT) | Until Oct 2018 - Siemens Biograph mCT (64-slice CT)<br>After Oct 2018 - Siemens Biograph Vision (64-slice CT)<br>Some of the 2-year visit CT scans were performed on Siemens Somatom Definition AS (128 slice CT). |
| Oxford      | GE Discovery 690 PET/CT                                                                                       | GE Discovery 690 PET/CT                                                                                                                                                                                            |
| Leeds       | 64-slice CT (GE Discovery 690 and 710 models)                                                                 | 64-slice CT (GE Discovery 690 and 710 models)                                                                                                                                                                      |
| Birmingham  | Siemens Biograph mCT Flow                                                                                     | Siemens Somatom Definition 64-slice scanner SAFIRE                                                                                                                                                                 |
| Cambridge   | PET/CT GE Discovery 690                                                                                       | PET/CT GE Discovery 690                                                                                                                                                                                            |
| Los Angeles | GE Discovery PET/CT 710 (GE Medical Systems)                                                                  | SOMATOM Definition scanner (Force, Siemens Medical)                                                                                                                                                                |
| Adelaide    | Biograph mCT Flow 64-slice PET/CT system (Siemens Medical Solutions USA, Inc.)                                | Biograph mCT Flow 64-slice PET/CT system (Siemens Medical Solutions USA, Inc.)                                                                                                                                     |

**eTable 3.** Clinical Outcomes in Quartiles of Increased Coronary Microcalcification Activity Compared With No Coronary Microcalcification Activity

|                                                         | <b>Hazard ratio (95% confidence interval)</b> |                                           |                                           |                                 |
|---------------------------------------------------------|-----------------------------------------------|-------------------------------------------|-------------------------------------------|---------------------------------|
|                                                         | <b>0 &lt; CMA ≤ 0.55<br/>(n = 106)</b>        | <b>0.55 &lt; CMA ≤ 1.85<br/>(n = 105)</b> | <b>1.85 &lt; CMA ≤ 3.87<br/>(n = 105)</b> | <b>CMA ≥ 3.87<br/>(n = 105)</b> |
| <b>Primary outcome</b>                                  | 1.27<br>(0.77 to 2.09)                        | 1.26<br>(0.76 to 2.07)                    | 1.20<br>(0.73 to 1.97)                    | 1.29<br>(0.79 to 2.09)          |
| <b>All cause death</b>                                  | 2.99<br>(1.19 to 7.55)                        | 2.26<br>(0.84 to 6.07)                    | 2.89<br>(1.15 to 7.29)                    | 2.89<br>(1.15 to 7.29)          |
| <b>Cardiac death</b>                                    | 2.85<br>(0.40 to 20.2)                        | 2.83<br>(0.40 to 20.1)                    | 5.59<br>(1.02 to 30.5)                    | 2.77<br>(0.39 to 19.7)          |
| <b>Non-fatal myocardial infarction</b>                  | 1.60 (0.71 to 3.60)                           | 1.21<br>(0.50 to 2.92)                    | 1.76<br>(0.80 to 3.84)                    | 1.87<br>(0.88 to 4.00)          |
| <b>Unscheduled coronary revascularisation</b>           | 1.01<br>(0.54 to 1.91)                        | 1.27<br>(0.70 to 2.28)                    | 0.67<br>(0.32 to 1.40)                    | 0.97<br>(0.51 to 1.82)          |
| <b>Cardiac death or non-fatal myocardial infarction</b> | 1.74<br>(0.83 to 3.66)                        | 1.39<br>(0.63 to 3.07)                    | 2.18<br>(1.09 to 4.36)                    | 1.97<br>(0.97 to 3.99)          |

CMA - coronary microcalcification activity

**eTable 4.** Site Investigator Reported Adverse Events

|                                   | <b>Number of Events</b> | <b>Number of Patients</b> | <b>Possibly Related to IMP</b> | <b>Possibly Related to NIMP</b> |
|-----------------------------------|-------------------------|---------------------------|--------------------------------|---------------------------------|
| <b>All Adverse Events</b>         | <b>15</b>               | <b>15</b>                 |                                |                                 |
|                                   |                         |                           |                                |                                 |
| <b>Serious Adverse Events</b>     | <b>2</b>                | <b>2</b>                  | <b>0</b>                       | <b>2</b>                        |
| Palpitation                       | 1                       | 1                         | 0                              | 1                               |
| Beta-blocker induced bradycardia  | 1                       | 1                         | 0                              | 1                               |
|                                   |                         |                           |                                |                                 |
| <b>Non-serious Adverse Events</b> | <b>13</b>               | <b>13</b>                 | <b>3</b>                       | <b>9</b>                        |
| Contrast reaction*                | 8                       | 8                         | 3                              | 7                               |
| Cannula access site               | 5                       | 5                         | 0                              | 2                               |

IMP – Investigational medicinal product (18F-sodium fluoride)

NIMP – Non-investigational medicinal product (iodinated contrast media, beta-blockade and glyceryl trinitrate)

\*Two reactions were felt to be possibly related to either the IMP or the NIMP.

**eFigure 1.** Measurement of Coronary Microcalcification Activity With  $^{18}\text{F}$ -Sodium Fluoride Uptake

Example 3-dimensional reconstructions of coronary  $^{18}\text{F}$ -sodium fluoride positron emission tomography and computed tomography angiography in patients with (A) low uptake and no coronary microcalcification activity (CMA = 0), and (B) two areas of intense uptake in the right and circumflex coronary arteries and high coronary microcalcification activity (CMA > 0).

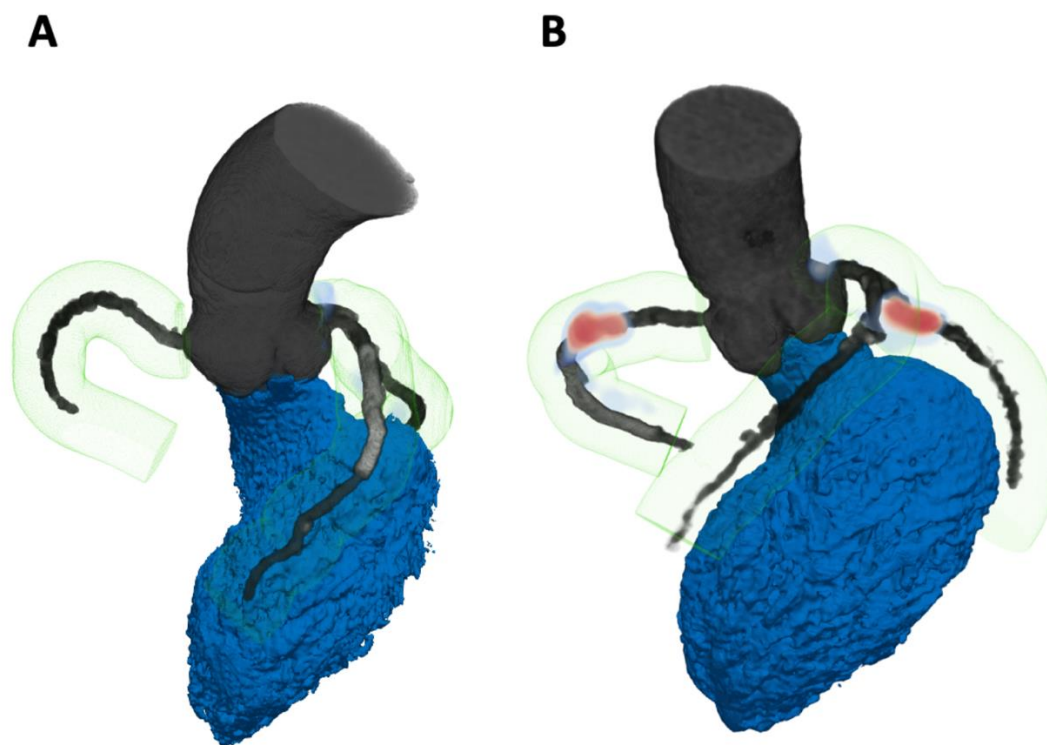

Three-dimensional volumes of interest in transparent green, regions of intense  $^{18}\text{F}$ -sodium fluoride uptake in red, aorta and coronary arteries in dark grey, coronary stent in light grey and left ventricular cavity in blue.

**eFigure 2. CONSORT Diagram**

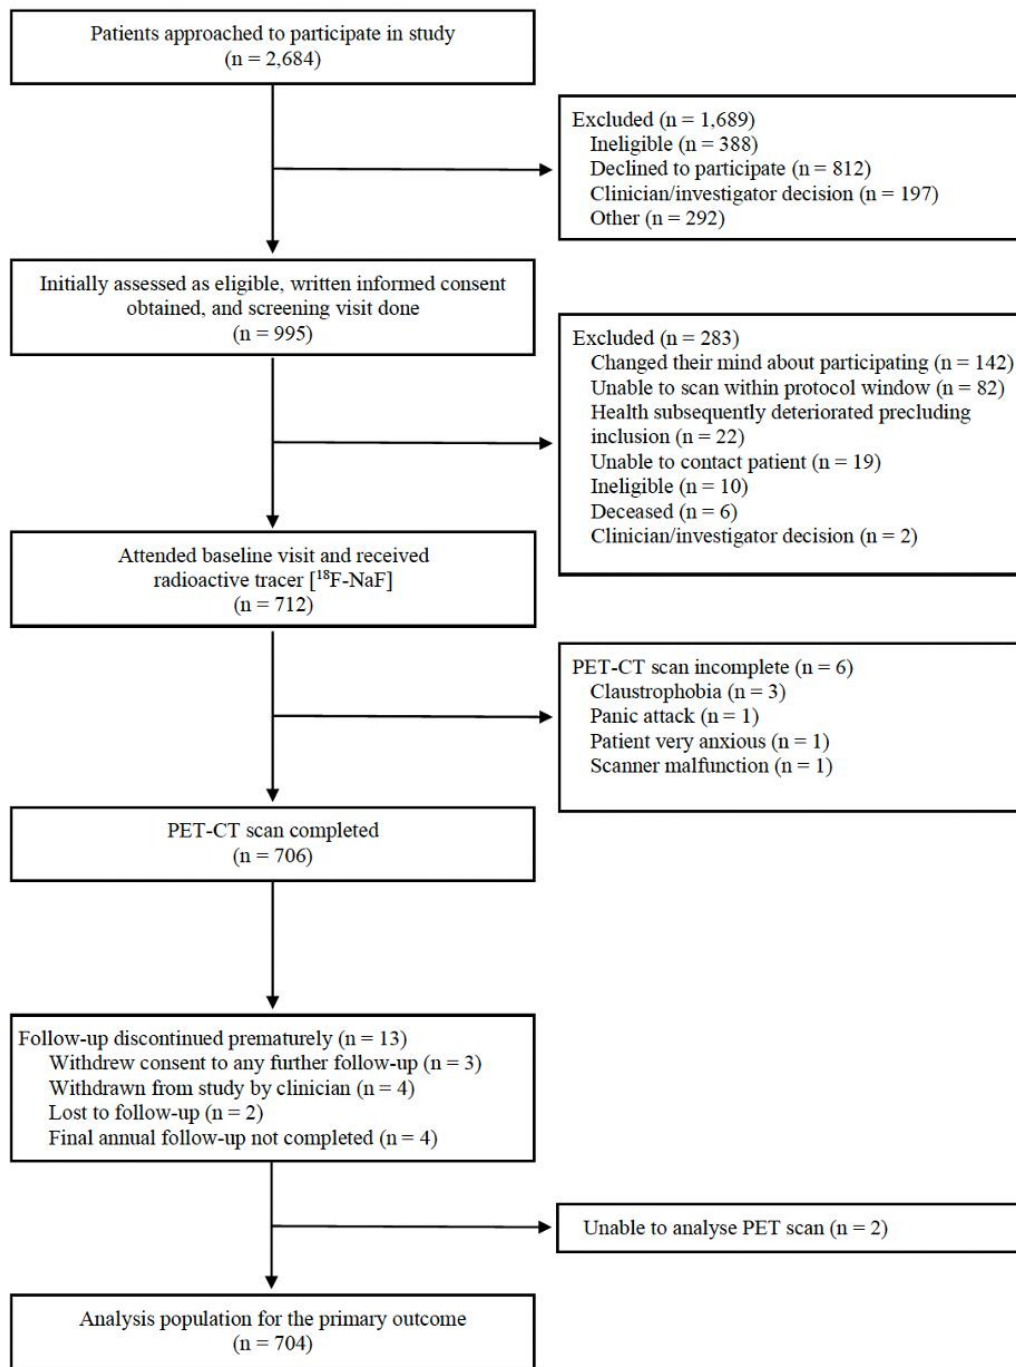

Supplement: jamacardiol-e231729-s001.pdf [file jamacardiol-e231729-s001.pdf]
