# Supplementary material
Source: PubMed Central journal article supplement (PMC10308296)
Supplement: jamacardiol-e231729-s002.pdf [file jamacardiol-e231729-s002.pdf]

\*Indicates required information. Only first name, last name, and suffix will appear in PubMed.

| <b>*Group Name(s): The PRE<sup>18</sup> FFIR Investigators</b> |                   |                              |                    |                                                                          |                                          |                                                         |                                                                                            |
|----------------------------------------------------------------|-------------------|------------------------------|--------------------|--------------------------------------------------------------------------|------------------------------------------|---------------------------------------------------------|--------------------------------------------------------------------------------------------|
| <b>*First Name and Middle Initial(s)</b>                       | <b>*Last Name</b> | <b>*Suffix (eg, Jr, III)</b> | Academic Degrees   | Institution                                                              | Location (city, state/province, country) | Role or Contribution, eg, chair, principal investigator | Group (if more than 1 Group listed in the byline) and/or Subgroup (eg, Steering Committee) |
| Anny                                                           | Briola            |                              |                    | Edinburgh Clinical Trials Unit, Usher Institute, University of Edinburgh | Edinburgh                                | Statistician                                            |                                                                                            |
| Ruth                                                           | Armstrong         |                              |                    | Edinburgh Clinical Trials Unit, Usher Institute, University of Edinburgh | Edinburgh                                | Data Management                                         |                                                                                            |
| Alix                                                           | Macdonald         |                              |                    | Edinburgh Clinical Trials Unit, Usher Institute, University of Edinburgh | Edinburgh                                | Trial Management                                        |                                                                                            |
| Gill                                                           | Scott             |                              | PhD                | Edinburgh Clinical Trials Unit, Usher Institute, University of Edinburgh | Edinburgh                                | Trial Management                                        |                                                                                            |
| Garry                                                          | Milne             |                              |                    | Edinburgh Clinical Trials Unit, Usher Institute, University of Edinburgh | Edinburgh                                | Programmer                                              |                                                                                            |
| Lynsey                                                         | Milne             |                              |                    | Edinburgh Clinical Trials Unit, Usher Institute, University of Edinburgh | Edinburgh                                | Data Management                                         |                                                                                            |
| Claire                                                         | Battison          |                              |                    | Edinburgh Clinical Trials Unit, Usher Institute, University of Edinburgh | Edinburgh                                | Trial Management                                        |                                                                                            |
| Martin R                                                       | Wilkins           |                              | MD                 | Imperial College London                                                  | London                                   | Chair                                                   | Trial Steering Committee                                                                   |
| Robert F                                                       | Storey            |                              | BM, DM, FRCP, FESC | University of Sheffield                                                  | Sheffield                                |                                                         | Trial Steering Committee                                                                   |
| Reza                                                           | Razavi            |                              | MD                 | King's College                                                           | London                                   |                                                         | Trial Steering Committee                                                                   |

Supplemental Online Content: Nonauthor Collaborators

\*Indicates required information. Only first name, last name, and suffix will appear in PubMed.

| <b>*First Name and Middle Initial(s)</b> | <b>*Last Name</b> | <b>*Suffix (eg, Jr, III)</b> | Academic Degrees | Institution    | Location (city, state/province, country) | Role or Contribution, eg, chair, principal investigator | Group (if more than 1 Group listed in the byline) and/or Subgroup (eg, Steering Committee) |
|------------------------------------------|-------------------|------------------------------|------------------|----------------|------------------------------------------|---------------------------------------------------------|--------------------------------------------------------------------------------------------|
| Maja                                     | Wallberg          |                              |                  | Wellcome Trust | UK                                       |                                                         | Trial Steering Committee                                                                   |
| Rodney                                   | Mycock            |                              |                  |                | UK                                       | Patient Representative                                  | Trial Steering Committee                                                                   |
