# Supplementary material
Source: PubMed Central journal article supplement (PMC10308296)
Supplement: jamacardiol-e231729-s003.pdf [file jamacardiol-e231729-s003.pdf]

## Data Sharing Statement

Moss. Coronary Atherosclerotic Plaque Activity and Future Coronary Events. *JAMA Cardiol.*  
Published June 28, 2023. doi:10.1001/jamacardio.2023.1729

### Data

**Data available:** Yes

**Data types:** Deidentified participant data

**How to access data:** Contact with the corresponding author

**When available:** With publication

### Supporting Documents

**Document types:** Statistical/analytic code

**How to access documents:** Contact with the corresponding author

**When available:** With publication

### Additional Information

**Who can access the data:** Anyone making a reasonable request

**Types of analyses:** Depends on the requirements of the researcher

**Mechanisms of data availability:** Contact with the corresponding author
